# Supplementary material for: Characterization and optimization of the growth conditions of a novel Cs2TeW3O12piezoelectric crystal
Source: Royal Society of Chemistry journal article supplement (doi:10.1039/c6ra26776a), 2017-01-01
Supplement: c6ra26776a1.pdf [file c6ra26776a1.pdf]

**Electronic Supplementary Information for:**  
**Characterization and Optimization of the Growth Conditions of a**  
**Novel Cs<sub>2</sub>TeW<sub>3</sub>O<sub>12</sub> Piezoelectric Crystal**

**Peng Zhao,<sup>a</sup> Qian Wu,<sup>a</sup> Zeliang Gao,<sup>a,b\*</sup> Xiangxin Tian,<sup>a</sup> Conggang Li,<sup>a</sup> Youxuan Sun,<sup>a</sup>  
Chengqian Zhang,<sup>a</sup> Shengqing Xia,<sup>a</sup> and Xutang Tao<sup>a,b\*</sup>**

<sup>a</sup> *State Key Laboratory of Crystal Materials, Shandong University, No.27 Shanda South Road, Jinan, 250100, China.*

<sup>b</sup> *Key Laboratory of Functional Crystal Materials and Device (Shandong University, Ministry of Education), No.27 South Shanda Road, Jinan, 250100, China*

*E-mail: txt@sdu.edu.cn; Fax: +86-531-88574135; Tel: +86-531-88364963; E-mail: gaozeliang@sdu.edu.cn*

Fig. S1 Ball-and-stick diagram of CTW in ac-plane.

Fig. S2 Directions of dipole moments of each WO<sub>6</sub> and TeO<sub>3</sub> polyhedra in the unit cell of CTW.

Fig. S3 Atomic coordinates and dipole moment of CTW.

Fig. S4. Bond valence calculation for Cs<sub>2</sub>TeW<sub>3</sub>O<sub>12</sub>.

Figure S1. Ball-and-stick diagram of CTW in ac-plane. Note that CTW exhibits a two-dimensional layered structure along the c-direction. Every layer consists of wave-connected  $\text{WO}_6$  octahedra, and  $\text{TeO}_3$  polyhedra covering the same side of the W-O layer. The distance between these layers is  $3.25 \text{ \AA}$ .

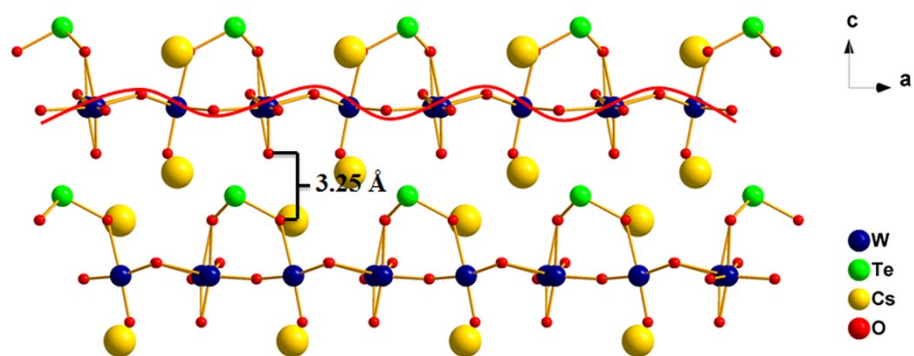

Figure S2. Directions of dipole moments of each  $\text{WO}_6$  and  $\text{TeO}_3$  polyhedra in the unit cell of CTW. Note that the light blue and green arrows indicate the directions of dipole moments for  $\text{WO}_6$  and  $\text{TeO}_3$  polyhedra, respectively. The red arrow indicates the direction of the net dipole moments of the unit cell.

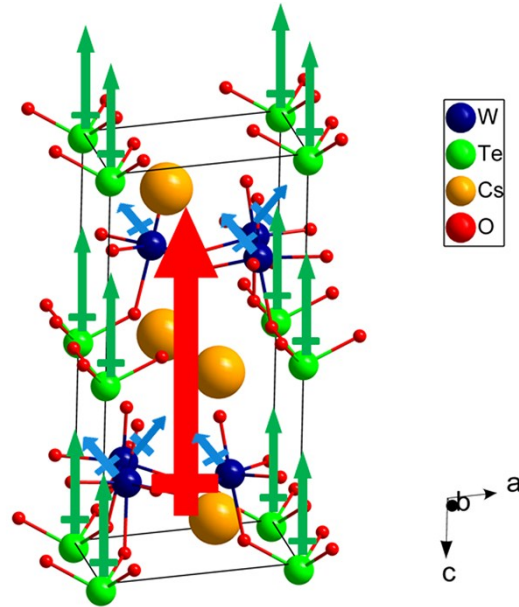

Figure S3. Atomic coordinates and dipole moment of CTW.

| Atomic coordinates for Cs <sub>2</sub> TeW <sub>3</sub> O <sub>12</sub> |         |        |         |  |          |          |          |  |  |
|-------------------------------------------------------------------------|---------|--------|---------|--|----------|----------|----------|--|--|
|                                                                         | x       | y      | z       |  | x        | y        | z        |  |  |
| <b>W</b>                                                                | 0.85407 | 1.1928 | 0.28018 |  | 6.25854  | 8.740719 | 3.476333 |  |  |
| 01                                                                      | 1.1267  | 1.2493 | 0.2706  |  | 8.256345 | 9.154745 | 3.35747  |  |  |
| 01                                                                      | 0.7507  | 0.8774 | 0.2706  |  | 5.501055 | 6.429499 | 3.35747  |  |  |
| 02                                                                      | 0.5483  | 1.0883 | 0.3184  |  | 4.017888 | 7.974954 | 3.950548 |  |  |
| 02                                                                      | 0.9117  | 1.46   | 0.3184  |  | 6.680846 | 10.69873 | 3.950548 |  |  |
| 03                                                                      | 0.8664  | 1.1284 | 0.4449  |  | 6.348893 | 8.268802 | 5.520097 |  |  |
| 04                                                                      | 0.8058  | 1.1958 | 0.1425  |  | 5.904822 | 8.762703 | 1.768069 |  |  |
| <b>Te</b>                                                               | 0       | 0      | 0.51674 |  | 0        | 0        | 6.411452 |  |  |
| 03                                                                      | -0.1336 | 0.1284 | 0.4449  |  | -0.97901 | 0.940902 | 5.520097 |  |  |
| 03                                                                      | -0.1284 | -0.262 | 0.4449  |  | -0.9409  | -1.91991 | 5.520097 |  |  |
| 03                                                                      | 0.262   | 0.1336 | 0.4449  |  | 1.91991  | 0.979007 | 5.520097 |  |  |

| WO <sub>6</sub> in CTW |      |         | Cart. Coord. |         |         | distance              | unit vector   |         |         |              | dipole moment for each |          |         |
|------------------------|------|---------|--------------|---------|---------|-----------------------|---------------|---------|---------|--------------|------------------------|----------|---------|
| Z                      | atom | charges | x            | y       | z       | Å                     | x             | y       | z       | unitized Vec | C_grav                 | C_charge | u_debye |
| 74                     | W    | 6.09979 | 6.25854      | 8.74072 | 3.47633 |                       |               |         |         |              |                        |          |         |
| 8                      | O1   | -1.264  | 8.25635      | 9.15475 | 3.35747 | 2.044                 | -0.9775       | -0.2026 | 0.05816 | 1            | 0.09756                | 0.12006  | 17.0313 |
| 8                      | O1   | -0.709  | 5.50106      | 6.4295  | 3.35747 | 2.435                 | 0.31107       | 0.94913 | 0.04881 | 1            | 0.09756                | 0.11368  | 14.4353 |
| 8                      | O2   | -0.739  | 4.01789      | 7.97495 | 3.95055 | 2.415                 | 0.92784       | 0.3171  | -0.1964 | 1            | 0.09756                | 0.11403  | 14.6309 |
| 8                      | O2   | -1.209  | 6.68085      | 10.6987 | 3.95055 | 2.058                 | -0.2052       | -0.9512 | -0.2304 | 1            | 0.09756                | 0.11943  | 16.662  |
| 8                      | O3   | -0.594  | 6.34889      | 8.2688  | 5.5201  | 2.099                 | -0.043        | 0.22478 | -0.9735 | 1            | 0.09756                | 0.11235  | 11.401  |
| 8                      | O4   | -1.584  | 5.90482      | 8.7627  | 1.76807 | 1.745                 | 0.20275       | -0.0126 | 0.97915 | 1            | 0.09756                | 0.12369  | 16.9516 |
|                        |      |         |              |         |         | Cell Volume           | Dipole Moment |         |         |              | Magnitude              |          |         |
|                        |      |         |              |         |         | Z                     | x             | y       | z       |              |                        |          |         |
|                        |      |         |              |         |         | 2                     | 0.00606       | 0.9447  | 1.3899  | 0.4832       | 1.7486                 | debye    |         |
|                        |      |         |              |         |         | Total Dipole Moment = |               |         |         |              |                        |          |         |

| WO <sub>6</sub> in CTW |      |         | Cart. Coord. |         |         | distance              | unit vector   |         |         |              | dipole moment for each |          |         |
|------------------------|------|---------|--------------|---------|---------|-----------------------|---------------|---------|---------|--------------|------------------------|----------|---------|
| Z                      | atom | charges | x            | y       | z       | Å                     | x             | y       | z       | unitized Vec | C_grav                 | C_charge | u_debye |
| 74                     | W    | 6.09979 | 0            | 0       | 0       |                       |               |         |         |              |                        |          |         |
| 8                      | O1   | -1.2644 | -1.9978      | -0.414  | 0.11886 | 2.044                 | -0.9775       | -0.2026 | 0.05816 | 1            | 0.09756                | 0.12006  | 17.0313 |
| 8                      | O1   | -0.7091 | 0.75749      | 2.31122 | 0.11886 | 2.435                 | 0.31107       | 0.94913 | 0.04881 | 1            | 0.09756                | 0.11368  | 14.4353 |
| 8                      | O2   | -0.7392 | 2.24065      | 0.76577 | -0.4742 | 2.415                 | 0.92784       | 0.3171  | -0.1964 | 1            | 0.09756                | 0.11403  | 14.6309 |
| 8                      | O2   | -1.2092 | -0.4223      | -1.958  | -0.4742 | 2.058                 | -0.2052       | -0.9512 | -0.2304 | 1            | 0.09756                | 0.11943  | 16.662  |
| 8                      | O3   | -0.5942 | -0.0904      | 0.47192 | -2.0438 | 2.099                 | -0.043        | 0.22478 | -0.9735 | 1            | 0.09756                | 0.11235  | 11.401  |
| 8                      | O4   | -1.5836 | 0.35372      | -0.022  | 1.70826 | 1.745                 | 0.20275       | -0.0126 | 0.97915 | 1            | 0.09756                | 0.12369  | 16.9516 |
|                        |      |         |              |         |         | Cell Volume           | Dipole Moment |         |         |              | Magnitude              |          |         |
|                        |      |         |              |         |         | Z                     | x             | y       | z       |              |                        |          |         |
|                        |      |         |              |         |         | 2                     | 0.00606       | 0.9447  | 1.3899  | 0.4832       | 1.7486                 | debye    |         |
|                        |      |         |              |         |         | Total Dipole Moment = |               |         |         |              |                        |          |         |

| TeO3 in CTW |         | Coord.      |          | distance              |               | unitized     |             | C_grav   |              | C_charge |          | u_debye |          |
|-------------|---------|-------------|----------|-----------------------|---------------|--------------|-------------|----------|--------------|----------|----------|---------|----------|
| Z           | charges | x           | y        | z                     | x             | y            | z           |          |              |          |          |         |          |
| 52          | Te      | 3.539370714 | 0        | 0                     | 6.411452      |              |             |          |              |          |          |         |          |
| 8           | O3      | -1.17979024 | -0.97901 | 0.940902              | 5.520097      | 1.624275497  | -0.60274    | 0.57927  | -0.549770822 | 1        | 0.133333 | 0.15926 | 11.17418 |
| 8           | O3      | -1.17979024 | -0.9409  | -1.91991              | 5.520097      | 2.316432808  | -0.40618    | 0.82882  | -0.384796398 | 1        | 0.133333 | 0.15926 | 15.93586 |
| 8           | O3      | -1.17979024 | 1.91991  | 0.979007              | 5.520097      | 2.332171274  | 0.823229    | -0.41978 | -0.382199631 | 1        | 0.133333 | 0.15926 | 16.04414 |
|             |         |             |          | Cell Volume           | Dipole Moment |              |             |          | Magnitude    |          |          |         |          |
|             |         |             |          | Z                     | x             | y            | z           |          |              |          |          |         |          |
|             |         |             |          | 2                     | 0.02493       | -1.77636E-15 | 6.87948E-06 | -7.19166 | 18.3962      | esu*cm   |          |         |          |
|             |         |             |          | Total Dipole Moment = |               |              |             |          |              |          |          |         |          |
|             |         |             |          | pm/V                  |               |              |             |          |              |          |          |         |          |

| TeO3 in CTW |         | Coord.      |          | distance              |               | unitized     |              | C_grav   |              | C_charge |          | u_debye |          |
|-------------|---------|-------------|----------|-----------------------|---------------|--------------|--------------|----------|--------------|----------|----------|---------|----------|
| Z           | charges | x           | y        | z                     | x             | y            | z            |          |              |          |          |         |          |
| 52          | Te      | 3.539370714 | 0        | 0                     | 6.411452      |              |              |          |              |          |          |         |          |
| 8           | O3      | -1.17979024 | -0.97901 | 0.940902              | -0.89136      | 1.624275497  | -0.60274     | 0.579275 | -0.548770822 | 1        | 0.133333 | 0.15926 | 11.17418 |
| 8           | O3      | -1.17979024 | -0.9409  | -1.91991              | -0.89136      | 2.316432808  | -0.40618     | -0.82882 | -0.384796398 | 1        | 0.133333 | 0.15926 | 15.93586 |
| 8           | O3      | -1.17979024 | 1.91991  | 0.979007              | -0.89136      | 2.332171274  | 0.823229     | 0.419783 | -0.382199631 | 1        | 0.133333 | 0.15926 | 16.04414 |
|             |         |             |          | Cell Volume           | Dipole Moment |              |              |          | Magnitude    |          |          |         |          |
|             |         |             |          | Z                     | x             | y            | z            |          |              |          |          |         |          |
|             |         |             |          | 2                     | 0.02493       | -1.77636E-15 | -2.68941E-06 | -7.19166 | 7.1917       | esu*cm   |          |         |          |
|             |         |             |          | Total Dipole Moment = |               |              |              |          |              |          |          |         |          |
|             |         |             |          | pm/V                  |               |              |              |          |              |          |          |         |          |

Figure S4. Bond valence calculation for Cs<sub>2</sub>TeW<sub>3</sub>O<sub>12</sub>.

| <b>Bond valence calculation for Cs<sub>2</sub>TeW<sub>3</sub>O<sub>12</sub></b> |               |                    |
|---------------------------------------------------------------------------------|---------------|--------------------|
|                                                                                 | bond-distance | bond valence       |
| <b>Cs1</b>                                                                      |               |                    |
| Cs1-04                                                                          | 3.028         | 0.159558275        |
| Cs1-04                                                                          | 3.028         | 0.159558275        |
| Cs1-04                                                                          | 3.028         | 0.159558275        |
| Cs1-02                                                                          | 3.094         | 0.136304495        |
| Cs1-02                                                                          | 3.094         | 0.136304495        |
| Cs1-02                                                                          | 3.094         | 0.136304495        |
| Cs1-01                                                                          | 3.41          | 0.064117331        |
| Cs1-01                                                                          | 3.41          | 0.064117331        |
| Cs1-01                                                                          | 3.41          | 0.064117331        |
| Cs1-03                                                                          | 3.673         | 0.034227511        |
| Cs1-03                                                                          | 3.673         | 0.034227511        |
| Cs1-03                                                                          | 3.673         | 0.034227511        |
| $\Sigma S_i$                                                                    |               | <b>1.182622838</b> |
| <b>Cs2</b>                                                                      |               |                    |
| Cs2-03                                                                          | 3.113         | 0.130261668        |
| Cs2-03                                                                          | 3.113         | 0.130261668        |
| Cs2-03                                                                          | 3.113         | 0.130261668        |
| Cs2-01                                                                          | 3.495         | 0.052344703        |
| Cs2-01                                                                          | 3.495         | 0.052344703        |
| Cs2-01                                                                          | 3.495         | 0.052344703        |
| Cs2-02                                                                          | 3.675         | 0.034064523        |
| Cs2-02                                                                          | 3.675         | 0.034064523        |
| Cs2-02                                                                          | 3.675         | 0.034064523        |
| Cs2-04                                                                          | 3.74          | 0.029169546        |
| Cs2-04                                                                          | 3.74          | 0.029169546        |
| Cs2-04                                                                          | 3.74          | 0.029169546        |
| $\Sigma S_i$                                                                    |               | <b>0.737521318</b> |
| <b>W</b>                                                                        |               |                    |
| W-01                                                                            | 1.8302        | 0.78238729         |
| W-02                                                                            | 2.0442        | 1.395109592        |
| W-03                                                                            | 2.0288        | 1.338234692        |
| W-04                                                                            | 1.8467        | 0.818067186        |
| W-05                                                                            | 2.1096        | 1.664841177        |
| W-06                                                                            | 1.7469        | 0.624664521        |
| $\Sigma S_i$                                                                    |               | <b>6.623304458</b> |
| <b>Te</b>                                                                       |               |                    |
| Te1-03                                                                          | 1.8866        | 1.179790238        |
| Te1-03                                                                          | 1.8866        | 1.179790238        |
| Te1-03                                                                          | 1.8866        | 1.179790238        |
| $\Sigma S_i$                                                                    |               | <b>3.539370714</b> |
